# Supplementary material
Source: ML conference proceedings conference paper supplement (https://proceedings.mlr.press/v119/nguyen20f.html)
Supplement: Supplementary file [file nguyen20f-supp.pdf]

## A. Organization of the Appendix

Appendix B describes the Greedy algorithm to solve Noisy  $\mathbf{M}k\mathbf{SC}$  and its approximation ratio.

Appendix C provides omitted proofs from Section 3.

Appendix D provides omitted proofs from Section 4.

Appendix E presents details of the sampling method for Influence Maximization with  $k$  topics.

## B. Greedy Algorithm

In this part, we investigate performance guarantee of Greedy algorithm. Greedy has been proven to obtain an approximation ratio of 2 for  $\mathbf{M}k\mathbf{SC}$  with monotone non-noisy objective function (Ohsaka & Yoshida, 2015). We extend the authors' proof to  $\mathbf{M}k\mathbf{SC}$  under noise and show that Greedy is able to obtain approximation of  $\frac{2+2\epsilon B}{1-\epsilon}$  when  $f$  is monotone and  $\frac{(2+2\epsilon+4\epsilon B)(1+\epsilon)}{(1-\epsilon)^2} + 1$  in case of non-monotonicity.

The pseudo code of Greedy is presented by Alg. 4

---

### Algorithm 4 Greedy Algorithm

---

**Input**  $F, k, B$

- 1:  $\mathbf{s}^0 = \{\emptyset, \emptyset, \dots, \emptyset\}$
- 2: **for**  $t = 1 \rightarrow B$  **do**
- 3:      $e, i = \operatorname{argmax}_{e \in V; i \in [k]} F(\mathbf{s}^{t-1} \sqcup \langle e, i \rangle)$
- 4:      $\mathbf{s}^t = \mathbf{s}^{t-1} \sqcup \langle e, i \rangle$

**Return**  $\mathbf{s}^B$  if  $f$  is **monotone**;  $\operatorname{argmax}_{\mathbf{s}^t; t \in \{1, \dots, B\}} F(\mathbf{s}^t)$  if  $f$  is **non-monotone**.

---

**Theorem 5.** Given an instance of Noisy  $\mathbf{M}k\mathbf{SC}$  with input  $V, k, B$  and  $F$  is an  $\epsilon$ -estimation of the **monotone**  $k$ -submodular objective function  $f$ . If  $\mathbf{s}$  is an output of the Greedy algorithm and  $\mathbf{o}$  is an optimal solution, then

$$f(\mathbf{o}) \leq \frac{2 + 2\epsilon B}{1 - \epsilon} f(\mathbf{s}) \quad (3)$$

*Proof.* Let  $e^j$  and  $i^j$  be a selection in iteration  $j$  of the Greedy algorithm, we construct a sequence  $\{\mathbf{o}^j\}$  as follows:

- $\mathbf{o}^0 = \mathbf{o}$
- With  $j > 0$ , let  $S^j = \operatorname{supp}(\mathbf{o}^{j-1}) \setminus \operatorname{supp}(\mathbf{s}^{j-1})$ . Let  $\mathbf{o}^j = e^j$  if  $e^j \in S^j$ , otherwise let  $\mathbf{o}^j$  to be an arbitrary element in  $S^j$ .
  - Define  $\mathbf{o}^{j-1/2}$  as a  $k$ -set that  $\mathbf{o}^{j-1/2}(e) = \mathbf{o}^{j-1}(e) \forall e \in V \setminus \{\mathbf{o}^j\}$  and  $\mathbf{o}^{j-1/2}(\mathbf{o}^j) = 0$ .
  - Define  $\mathbf{o}^j$  as a  $k$ -set that  $\mathbf{o}^j(e) = \mathbf{o}^{j-1/2}(e) \forall e \in V \setminus \{e^j\}$  and  $\mathbf{o}^j(e^j) = i^j$
  - Define  $\mathbf{s}^{j-1/2}$  as a  $k$ -set that  $\mathbf{s}^{j-1/2}(e) = \mathbf{s}^{j-1}(e) \forall e \in V \setminus \{\mathbf{o}^j\}$  and  $\mathbf{s}^{j-1/2}(\mathbf{o}^j) = i^j$ .

It is trivial that  $\mathbf{o}^B = \mathbf{s}^B$ . We have:

$$f(\mathbf{o}^{j-1}) - f(\mathbf{o}^j) \leq f(\mathbf{o}^{j-1}) - f(\mathbf{o}^{j-1/2}) \quad (4)$$

$$\leq f(\mathbf{s}^{j-1/2}) - f(\mathbf{s}^{j-1}) \quad (5)$$

$$\leq \frac{1}{1-\epsilon} F(\mathbf{s}^{j-1/2}) - f(\mathbf{s}^{j-1}) \quad (6)$$

$$\leq \frac{1}{1-\epsilon} F(\mathbf{s}^j) - f(\mathbf{s}^{j-1}) \quad (7)$$

$$\leq \frac{1+\epsilon}{1-\epsilon} f(\mathbf{s}^j) - f(\mathbf{s}^{j-1}) \quad (8)$$

The inequality (4) is due to  $f$  is monotone, thus  $f(\mathbf{o}^j) \geq f(\mathbf{o}^{j-1/2})$ . The inequality (5) is from  $k$ -submodularity of  $f$ . The inequality (7) is due to greedy selection. Therefore:

$$\begin{aligned} f(\mathbf{o}) - f(\mathbf{s}) &= \sum_{j=1}^B \left( f(\mathbf{o}^{j-1}) - f(\mathbf{o}^j) \right) \leq \sum_{j=1}^B \left( \frac{1+\epsilon}{1-\epsilon} f(\mathbf{s}^j) - f(\mathbf{s}^{j-1}) \right) \\ &\leq \frac{1+\epsilon}{1-\epsilon} f(\mathbf{s}) + \sum_{j=1}^B \frac{2\epsilon}{1-\epsilon} f(\mathbf{s}^j) \leq \frac{1+\epsilon+2\epsilon B}{1-\epsilon} f(\mathbf{s}) \end{aligned}$$

Thus  $f(\mathbf{o}) \leq \frac{2+2\epsilon B}{1-\epsilon} f(\mathbf{s})$ , which completes the proof.  $\square$

**Theorem 6.** Given an instance of Noisy  $\mathbf{MkSC}$  with input  $V, k, B$  and  $F$  is an  $\epsilon$ -estimation of the **non-monotone**  $k$ -submodular objective function  $f$ . If  $\mathbf{s}$  is an output of the Greedy algorithm and  $\mathbf{o}$  is an optimal solution, then

$$f(\mathbf{o}) \leq \frac{3+\epsilon+4\epsilon B}{1-\epsilon} f(\mathbf{s}) \quad (9)$$

*Proof.* We use the same definition of  $\mathbf{o}^j, \mathbf{o}^{j-1/2}, \mathbf{s}^j$  as in proof of Theorem 5.

Although  $f$  is non-monotone,  $f$  is *pairwise-monotone* due to  $k$ -submodularity (Ward & Živný, 2016). To be specific, given a  $k$ -set  $\mathbf{x}$  and  $e \notin \text{supp}(\mathbf{x})$ , we have

$$\Delta_{e,i} f(\mathbf{x}) + \Delta_{e,j} f(\mathbf{x}) \geq 0 \quad \forall i, j \in [k] \text{ and } i \neq j \quad (10)$$

Let consider a value of  $j \in [1, B]$ , due to pairwise-monotonicity, there should exist  $i' \in [k]$  that  $f(\mathbf{s}^{j-1} \sqcup \langle e^j, i' \rangle) \geq f(\mathbf{s}^{j-1})$ . Moreover, due to greedy selection,  $f(\mathbf{s}^{j-1} \sqcup \langle e^j, i' \rangle) \leq \frac{1}{1-\epsilon} F(\mathbf{s}^{j-1} \sqcup \langle e^j, i' \rangle) \leq \frac{1}{1-\epsilon} F(\mathbf{s}^j) \leq \frac{1+\epsilon}{1-\epsilon} f(\mathbf{s}^j)$ . Thus  $\frac{1+\epsilon}{1-\epsilon} f(\mathbf{s}^j) \geq f(\mathbf{s}^{j-1})$ . We consider 2 following cases:

- $\mathbf{o}^j = \mathbf{o}^{j-1}$ . In this case  $f(\mathbf{o}^{j-1}) - f(\mathbf{o}^j) = 0 \leq \frac{1+\epsilon}{1-\epsilon} f(\mathbf{s}^j) - f(\mathbf{s}^{j-1})$

- $\mathbf{o}^j \neq \mathbf{o}^{j-1}$ . There would be 2 sub-cases:

- $\mathbf{o}^{j-1}(e^j) = 0$ . Then let  $i' \in [k]$  be an arbitrary number and  $i' \neq i^j$ . Then

$$f(\mathbf{o}^{j-1}) - f(\mathbf{o}^j) = f(\mathbf{o}^{j-1}) + f(\mathbf{o}^{j-1/2} \sqcup \langle e^j, i' \rangle) - 2f(\mathbf{o}^{j-1/2}) - \left( f(\mathbf{o}^{j-1/2} \sqcup \langle e^j, i' \rangle) + f(\mathbf{o}^j) - 2f(\mathbf{o}^{j-1/2}) \right) \quad (11)$$

$$\leq f(\mathbf{o}^{j-1}) + f(\mathbf{o}^{j-1/2} \sqcup \langle e^j, i' \rangle) - 2f(\mathbf{o}^{j-1/2}) \quad (12)$$

$$\leq f(\mathbf{s}^{j-1/2}) + f(\mathbf{s}^{j-1} \sqcup \langle e^j, i' \rangle) - 2f(\mathbf{s}^{j-1}) \quad (13)$$

$$\leq \frac{1}{1-\epsilon} F(\mathbf{s}^{j-1/2}) + \frac{1}{1-\epsilon} F(\mathbf{s}^{j-1} \sqcup \langle e^j, i' \rangle) - 2f(\mathbf{s}^{j-1}) \quad (14)$$

$$\leq \frac{2}{1-\epsilon} F(\mathbf{s}^j) - 2f(\mathbf{s}^{j-1}) \leq 2\frac{1+\epsilon}{1-\epsilon} f(\mathbf{s}^j) - 2f(\mathbf{s}^{j-1}) \quad (15)$$

The inequality 12 is due to pairwise-monotonicity of  $f$ . The inequality 13 is from  $k$ -submodularity and inequality 15 is due to greedy selection.

- $\mathbf{o}^{j-1}(e^j) \neq i^j$ . Then:

$$\begin{aligned} f(\mathbf{o}^{j-1}) - f(\mathbf{o}^j) &= 2f(\mathbf{o}^{j-1}) - 2f(\mathbf{o}^{j-1/2}) - \left( f(\mathbf{o}^{j-1}) + f(\mathbf{o}^j) - 2f(\mathbf{o}^{j-1/2}) \right) \\ &\leq 2f(\mathbf{o}^{j-1}) - 2f(\mathbf{o}^{j-1/2}) \leq 2f(\mathbf{s}^{j-1/2}) - 2f(\mathbf{s}^{j-1}) \leq \frac{2}{1-\epsilon} F(\mathbf{s}^{j-1/2}) - 2f(\mathbf{s}^{j-1}) \\ &\leq \frac{2}{1-\epsilon} F(\mathbf{s}^j) - 2f(\mathbf{s}^{j-1}) \leq 2\frac{1+\epsilon}{1-\epsilon} f(\mathbf{s}^j) - 2f(\mathbf{s}^{j-1}) \end{aligned}$$

Both cases imply that  $f(\mathbf{o}^{j-1}) - f(\mathbf{o}^j) \leq 2\frac{1+\epsilon}{1-\epsilon}f(\mathbf{s}^j) - 2f(\mathbf{s}^{j-1})$ . Therefore:

$$\begin{aligned} f(\mathbf{o}) - f(\mathbf{s}) &= \sum_{j=1}^B \left( f(\mathbf{o}^{j-1}) - f(\mathbf{o}^j) \right) \leq 2 \sum_{j=1}^B \left( \frac{1+\epsilon}{1-\epsilon} f(\mathbf{s}^j) - f(\mathbf{s}^{j-1}) \right) \\ &\leq 2 \times \left( \frac{1+\epsilon}{1-\epsilon} f(\mathbf{s}^B) + \sum_{j=1}^B \frac{2\epsilon}{1-\epsilon} f(\mathbf{s}^j) \right) \leq \frac{2+2\epsilon+4\epsilon B}{1-\epsilon} \frac{1+\epsilon}{1-\epsilon} f(\mathbf{s}) \end{aligned}$$

Thus,  $f(\mathbf{o}) \leq \left( \frac{(2+2\epsilon+4\epsilon B)(1+\epsilon)}{(1-\epsilon)^2} + 1 \right) f(\mathbf{s})$ , which completes the proof.  $\square$

## C. DSTREAM Algorithm

In this part, we present in detail omitted proofs of DSTREAM's approximation ratio. There would be 2 separate sub-parts: one is for when  $f$  is **monotone** - which we describe omitted proofs of claims in Proposition 1; the other is for when  $f$  is **non-monotone** - which we would fully prove the Theorem 2.

### C.1. Approximation ratio of DSTREAM when $f$ is monotone

**Proof of Claim 1.** Denote  $\langle e^j, i^j \rangle$  as  $j$ -th addition of Alg. 1, i.e  $\mathbf{s}^j = \mathbf{s}^{j-1} \sqcup \langle e^j, i^j \rangle$ . Define:

$$\mathbf{o}^{j-1/2} = (\mathbf{o} \sqcup \mathbf{s}^j) \sqcup \mathbf{s}^{j-1}$$

Furthermore, define  $\mathbf{s}^{j-1/2}$  as:

- If  $e^j \in \text{supp}(\mathbf{o})$ , let  $i^j = \mathbf{o}(e^j)$ . Then  $\mathbf{s}^{j-1/2} = \mathbf{s}^{j-1} \sqcup \langle e^j, i^j \rangle$
- Otherwise,  $\mathbf{s}^{j-1/2} = \mathbf{s}^{j-1}$

We have:

$$f(\mathbf{o}^{j-1}) - f(\mathbf{o}^j) \leq f(\mathbf{o}^{j-1}) - f(\mathbf{o}^{j-1/2}) \quad (16)$$

$$\leq f(\mathbf{s}^{j-1/2}) - f(\mathbf{s}^{j-1}) \quad (17)$$

$$\leq \frac{1}{1-\epsilon} F(\mathbf{s}^{j-1/2}) - f(\mathbf{s}^{j-1}) \quad (18)$$

$$\leq \frac{1}{1-\epsilon} F(\mathbf{s}^j) - f(\mathbf{s}^{j-1}) \quad (19)$$

$$\leq \frac{1+\epsilon}{1-\epsilon} f(\mathbf{s}^j) - f(\mathbf{s}^{j-1}) \quad (20)$$

The Inequality 16 is due to monotonicity of  $f$ ; the inequality 17 is due to its  $k$ -submodularity and the inequality 19 is from selection of Alg. 1 that guarantees  $i^j = \text{argmax}_{i \in [k]} F(\mathbf{s}^{j-1} \sqcup \langle e^j, i \rangle)$ . Therefore:

$$\begin{aligned} f(\mathbf{o}) - f(\mathbf{o}^t) &= \sum_{j=1}^t \left( f(\mathbf{o}^{j-1}) - f(\mathbf{o}^j) \right) \leq \sum_{j=1}^t \left( \frac{1+\epsilon}{1-\epsilon} f(\mathbf{s}^j) - f(\mathbf{s}^{j-1}) \right) \\ &= \frac{1+\epsilon}{1-\epsilon} f(\mathbf{s}) + \sum_{i=1}^{t-1} \left( \frac{1+\epsilon}{1-\epsilon} - 1 \right) f(\mathbf{s}^i) \leq \frac{1+\epsilon+2B\epsilon}{1-\epsilon} f(\mathbf{s}) \end{aligned}$$

which completes the proof.

**Proof of Claim 2.** As  $\mathbf{s} \sqsubseteq \mathbf{o}^t$ , denote  $\{\langle u_1, j_1 \rangle, \dots, \langle u_r, j_r \rangle\}$  as a set of elements and their placement in  $\mathbf{o}^t$  that are not in  $\mathbf{s}$ .

For each  $\langle u_i, j_i \rangle$ , denote  $\mathbf{s}_i$  as  $\mathbf{s}$  when Alg. 1 encounters  $u_i$ . As  $u_i$  was not added into  $\mathbf{s}$ ,  $\frac{F(\mathbf{s}_i \sqcup \langle u_i, j_i \rangle)}{1-\epsilon} \leq (|\mathbf{s}_i| + 1) \frac{\rho}{M}$ . While  $\frac{F(\mathbf{s}_i)}{1-\epsilon} \geq |\mathbf{s}_i| \frac{\rho}{M}$ , we have:

$$\frac{F(\mathbf{s}_i \sqcup \langle u_i, j_i \rangle)}{1 - \epsilon} - \frac{F(\mathbf{s}_i)}{1 + \epsilon} \leq \frac{o}{M} + \frac{2\epsilon F(\mathbf{s}_i)}{1 - \epsilon^2}$$

Denote  $\mathbf{u}_i = \mathbf{s} \sqcup \{\langle u_1, j_1 \rangle, \dots, \langle u_i, j_i \rangle\}$ . We have

$$\begin{aligned} f(\mathbf{o}^t) - f(\mathbf{s}) &= \sum_{i=1}^{B-t} \left( f(\mathbf{u}_i) - f(\mathbf{u}_{i-1}) \right) \leq \sum_{i=1}^{B-t} \left( f(\mathbf{s}_i \sqcup \langle u_i, j_i \rangle) - f(\mathbf{s}_i) \right) \\ &\leq \sum_{i=1}^{B-t} \left( \frac{1}{1 - \epsilon} F(\mathbf{s}_i \sqcup \langle u_i, j_i \rangle) - \frac{1}{1 + \epsilon} F(\mathbf{s}_i) \right) \leq \sum_{i=1}^{B-t} \left( \frac{o}{M} + \frac{2\epsilon}{1 - \epsilon^2} F(\mathbf{s}_i) \right) \leq \frac{1}{M} f(\mathbf{o}) + \frac{2\epsilon B}{1 - \epsilon} f(\mathbf{s}) \end{aligned}$$

which complete the proof.

## C.2. Approximation of DSTREAM when $f$ is non-monotone

**Proof of Theorem 2** We still use definition of  $\mathbf{o}^j, \mathbf{o}^{j-1/2}, e^j, i^j, \mathbf{s}^j, \mathbf{s}^{j-1/2}$  as in the monotone proof. Also, for simplicity, we first prove the approximation ratio of Alg. 1 (assume  $f(\mathbf{o})$  is known).

If  $t = B$ ,  $f(\mathbf{s}) \geq \frac{1}{1+\epsilon} \max_{i \in \{1, \dots, B\}} F(\mathbf{s}^i) \geq \frac{1}{1+\epsilon} F(\mathbf{s}^B) \geq \frac{1-\epsilon}{1+\epsilon} B \frac{o}{M} \geq \frac{1-\epsilon}{1+\epsilon} \frac{1}{(1+\gamma)M} f(\mathbf{o})$ . The rest of the proof will focus on case  $t < B$ .

Due to pairwise-monotonicity of a  $k$ -submodular function, for any  $j \in \{1, \dots, t\}$ , there exists no pair  $i_1 \neq i_2 \in [k]$  that  $\Delta_{e^j, i_1} f(\mathbf{s}^{j-1}) < 0$  and  $\Delta_{e^j, i_2} f(\mathbf{s}^{j-1}) < 0$ . Therefore  $\max_{i \in [k]} f(\mathbf{s}^{j-1} \sqcup \langle e^j, i \rangle) \geq f(\mathbf{s}^{j-1})$ . Thus

$$f(\mathbf{s}^j) \geq \frac{F(\mathbf{s}^j)}{1 + \epsilon} = \frac{\max_{i \in [k]} F(\mathbf{s}^{j-1} \sqcup \langle e^j, i \rangle)}{1 + \epsilon} \geq \frac{1 - \epsilon}{1 + \epsilon} \max_{i \in [k]} f(\mathbf{s}^{j-1} \sqcup \langle e^j, i \rangle) \geq \frac{1 - \epsilon}{1 + \epsilon} f(\mathbf{s}^{j-1}) \quad (21)$$

Let's consider relation between  $\mathbf{o}^{j-1}$  and  $\mathbf{o}^j$ , there are 2 cases:

- $|supp(\mathbf{o}^{j-1})| < |supp(\mathbf{o}^j)|$ , which means  $e^j \notin supp(\mathbf{o})$ . We randomly pick  $i' \in [k]$  and  $i' \neq i^j$ , we have

$$\begin{aligned} f(\mathbf{o}^{j-1}) - f(\mathbf{o}^j) &= f(\mathbf{o}^{j-1} \sqcup \langle e^j, i' \rangle) - f(\mathbf{o}^{j-1}) - (f(\mathbf{o}^j) + f(\mathbf{o}^{j-1} \sqcup \langle e^j, i' \rangle) - 2f(\mathbf{o}^{j-1})) \\ &\leq f(\mathbf{o}^{j-1} \sqcup \langle e^j, i' \rangle) - f(\mathbf{o}^{j-1}) \leq f(\mathbf{s}^{j-1} \sqcup \langle e^j, i' \rangle) - f(\mathbf{s}^{j-1}) \\ &\leq \frac{1}{1 - \epsilon} F(\mathbf{s}^{j-1} \sqcup \langle e^j, i' \rangle) - f(\mathbf{s}^{j-1}) \leq \frac{1}{1 - \epsilon} F(\mathbf{s}^j) - f(\mathbf{s}^{j-1}) \\ &\leq \frac{1 + \epsilon}{1 - \epsilon} f(\mathbf{s}^j) - f(\mathbf{s}^{j-1}) \end{aligned}$$

- $|supp(\mathbf{o}^{j-1})| = |supp(\mathbf{o}^j)|$ , which means  $e^j \in supp(\mathbf{o})$ . We have 2 sub-cases

- $\mathbf{o}^{j-1}(e^j) = i^j$ . Then  $f(\mathbf{o}^{j-1}) - f(\mathbf{o}^j) = 0 \leq \frac{1+\epsilon}{1-\epsilon} f(\mathbf{s}^j) - f(\mathbf{s}^{j-1})$
- $\mathbf{o}^{j-1}(e^j) \neq i^j$ , we have

$$\begin{aligned} f(\mathbf{o}^{j-1}) - f(\mathbf{o}^j) &= 2f(\mathbf{o}^{j-1}) - 2f(\mathbf{o}^{j-1/2}) - (f(\mathbf{o}^{j-1}) + f(\mathbf{o}^j) - 2f(\mathbf{o}^{j-1/2})) \\ &\leq 2f(\mathbf{o}^{j-1}) - 2f(\mathbf{o}^{j-1/2}) \leq 2f(\mathbf{s}^{j-1/2}) - 2f(\mathbf{s}^{j-1}) \leq 2 \frac{1 + \epsilon}{1 - \epsilon} f(\mathbf{s}^j) - 2f(\mathbf{s}^{j-1}) \end{aligned}$$

Therefore, in overall  $f(\mathbf{o}^{j-1}) - f(\mathbf{o}^j) \leq 2 \frac{1+\epsilon}{1-\epsilon} f(\mathbf{s}^j) - 2f(\mathbf{s}^{j-1})$ . We have

$$f(\mathbf{o}) - f(\mathbf{o}^t) = \sum_{j=1}^t \left( f(\mathbf{o}^{j-1}) - f(\mathbf{o}^j) \right) \leq \sum_{j=1}^t 2 \left( \frac{1 + \epsilon}{1 - \epsilon} f(\mathbf{s}^j) - f(\mathbf{s}^{j-1}) \right) \quad (22)$$

$$= 2 \frac{1 + \epsilon}{1 - \epsilon} f(\mathbf{s}^t) + 2 \sum_{i=1}^{t-1} \frac{2\epsilon}{1 - \epsilon} f(\mathbf{s}^i) \leq \frac{2 + 2\epsilon + 4\epsilon B}{1 - \epsilon} \max_{i \leq t} f(\mathbf{s}^i) \leq \frac{(1 + \epsilon)(2 + 2\epsilon + 4\epsilon B)}{(1 - \epsilon)^2} f(\mathbf{s}) \quad (23)$$

Also, similar to monotone case, as  $\mathbf{s}^t \sqsubseteq \mathbf{o}^t$ , denote  $\{\langle u_1, j_1 \rangle, \dots, \langle u_r, j_r \rangle\}$  as a set of elements and their placement in  $\mathbf{o}^t$  that are not in  $\mathbf{s}^t$ . For each  $\langle u_i, j_i \rangle$ , denote  $\mathbf{s}_i$  as  $\mathbf{s}^t$  when Alg. 1 encounters  $u_i$ . Denote  $\mathbf{u}_i = \mathbf{s}^t \sqcup \{\langle u_1, j_1 \rangle, \dots, \langle u_i, j_i \rangle\}$ . We have

$$f(\mathbf{o}^t) - f(\mathbf{s}^t) = \sum_{i=1}^{B-t} \left( f(\mathbf{u}^i) - f(\mathbf{u}^{i-1}) \right) \leq \sum_{i=1}^{B-t} \left( f(\mathbf{s}_i \sqcup \langle u_i, j_i \rangle) - f(\mathbf{s}_i) \right) \quad (24)$$

$$\leq \sum_{i=1}^{B-t} \left( \frac{F(\mathbf{s}_i \sqcup \langle u_i, j_i \rangle)}{1-\epsilon} - \frac{F(\mathbf{s}_i)}{1+\epsilon} \right) \leq \sum_{i=1}^{B-t} \left( \frac{o}{M} + \frac{2\epsilon}{1-\epsilon^2} F(\mathbf{s}^i) \right) \quad (25)$$

$$\leq \frac{1}{M} f(\mathbf{o}) + \frac{2\epsilon B}{1-\epsilon^2} F(\mathbf{s}) \leq \frac{1}{M} f(\mathbf{o}) + \frac{2\epsilon B}{1-\epsilon} f(\mathbf{s}) \quad (26)$$

Combining Equ. 23 and 26, we have

$$\left(1 - \frac{1}{M}\right) f(\mathbf{o}) \leq \left( \frac{(1+\epsilon)(2+2\epsilon+4\epsilon B)}{(1-\epsilon)^2} + \frac{2\epsilon B}{1-\epsilon} + \frac{1+\epsilon}{1-\epsilon} \right) f(\mathbf{s}) = \frac{3+4\epsilon+6\epsilon B+\epsilon^2+2\epsilon^2 B}{(1-\epsilon)^2} f(\mathbf{s})$$

The approximation ratio of DSTREAM when discarding assumption of known  $f(\mathbf{o})$  is trivially follows as in the proof of the monotone case.

## D. RSTREAM Algorithm

In this part, we present in detail omitted proofs of RSTREAM's approximation ratio. There would be 2 separate sub-parts: one is for when  $f$  is **monotone** - which we describe omitted proofs of claims in Theorem 3; the other is for when  $f$  is **non-monotone** - which we would fully prove the Theorem 4.

Note that in proofs related to RSTREAM, we abuse the notation and simply write  $t$  and  $\mathbf{s}^i$  to indicate  $t_{j,\epsilon'}$  and  $\mathbf{s}_{j,\epsilon'}^i$  in Alg. 3 when  $o$  is estimated by  $M(1+\gamma)^j$  that satisfies  $f(\mathbf{o}) \geq oB \geq \frac{f(\mathbf{o})}{1+\gamma}$ ; and  $\epsilon' = \epsilon$ .

Similar to DSTREAM's proof, denote  $\langle e^j, i^j \rangle$  as  $j$ -th addition of Alg. 3, i.e  $\mathbf{s}^j = \mathbf{s}^{j-1} \sqcup \langle e^j, i^j \rangle$ . Define:

$$\mathbf{o}^{j-1/2} = (\mathbf{o} \sqcup \mathbf{s}^j) \sqcup \mathbf{s}^{j-1}$$

Furthermore, define  $\mathbf{s}^{j-1/2}$  as:

- If  $e^j \in \text{supp}(\mathbf{o})$ , let  $i^j$  be an index of a set containing  $e^j$  in  $\mathbf{o}$ . Then  $\mathbf{s}^{j-1/2} = \mathbf{s}^{j-1} \sqcup \langle e^j, i^j \rangle$
- Otherwise,  $\mathbf{s}^{j-1/2} = \mathbf{s}^{j-1}$

### D.1. Approximation ratio of RSTREAM when $f$ is monotone

**Proof of Lemma 1** We have:

$$\begin{aligned} F(\mathbf{s}) &= F(\mathbf{s}^B) = \sum_{i=1}^B \left( F(\mathbf{s}^i) - F(\mathbf{s}^{i-1}) \right) = \sum_{i=1}^B \left( F(\mathbf{s}^i) - \frac{1-\epsilon}{1+\epsilon} F(\mathbf{s}^{i-1}) \right) - \frac{2\epsilon}{1+\epsilon} \sum_{i=1}^{B-1} F(\mathbf{s}^i) \\ &\geq (1-\epsilon) \sum_{i=1}^B \frac{o}{M} - 2\epsilon \sum_{i=1}^{B-1} f(\mathbf{s}^i) \geq \frac{(1-\epsilon)f(\mathbf{o})}{(1+\gamma)M} - 2\epsilon B f(\mathbf{s}) \end{aligned}$$

Therefore,  $\frac{(1+\gamma)(1+\epsilon+2\epsilon B)M}{1-\epsilon} f(\mathbf{s}) \geq f(\mathbf{o})$

**Proof of Claim 3** Let's consider Alg. 3 before adding  $e^j$  into  $\mathbf{s}^{j-1}$ . Denote  $d_i = \frac{1}{1-\epsilon} F(\mathbf{s}^{j-1} \sqcup \langle e^j, i \rangle) - \frac{1}{1+\epsilon} F(\mathbf{s}^{j-1})$ . We consider the following cases:

- $|supp(\mathbf{o}^{j-1})| = |supp(\mathbf{o}^j)|$ , which means  $e^j \in supp(\mathbf{o})$ . Let  $p = \mathbf{o}^{j-1}(e^j)$ .

Let  $I \subseteq [k]$  be a set of values of  $i$  that  $d_i > \frac{o}{M}$ ,  $T = |I|$ .

We define  $\mathbf{o}_i^j$  as a  $k$ -set that  $\mathbf{o}_i^j(e) = \mathbf{o}^j(e) \forall e \in V \setminus \{e^j\}$  and  $\mathbf{o}_i^j(e^j) = i$ . Define  $\mathbf{o}^{j-1/2}$  as a  $k$ -set that  $\mathbf{o}^{j-1/2}(e) = \mathbf{o}^j(e) \forall e \in V \setminus \{e^j\}$  and  $\mathbf{o}^{j-1/2}(e^j) = 0$ .

Let  $\mathbf{s}_i^j = \mathbf{s}^{j-1} \sqcup \langle e^j, i \rangle$ . We have two following sub-cases:

- $d_p \geq \frac{o}{M}$ , then if  $T = 1$ ,  $\mathbf{o}^{j-1} = \mathbf{o}^j$  and  $f(\mathbf{o}^{j-1}) - f(\mathbf{o}^j) = 0 \leq (1 - \frac{1}{k})(\frac{1+\epsilon}{1-\epsilon}E[f(\mathbf{s}^j)] - \frac{1-\epsilon}{1+\epsilon}f(\mathbf{s}^{j-1}))$ . Thus, we assume  $T > 1$ , in which we have

$$f(\mathbf{o}^{j-1}) - E[f(\mathbf{o}^j)] = \frac{1}{D} \sum_{i \in I \setminus \{p\}} (f(\mathbf{o}^{j-1}) - f(\mathbf{o}_i^j)) d_i^{T-1} \leq \frac{1}{D} \sum_{i \in I \setminus \{p\}} (f(\mathbf{o}^{j-1}) - f(\mathbf{o}^{j-1/2})) d_i^{T-1} \quad (27)$$

$$\leq \frac{1}{D} \sum_{i \in I \setminus \{p\}} (f(\mathbf{s}_p^j) - f(\mathbf{s}^{j-1})) d_i^{T-1} \leq \frac{1}{D} \sum_{i \in I \setminus \{p\}} d_p d_i^{T-1} \quad (28)$$

$$\leq \frac{1}{D} \left(1 - \frac{1}{T}\right) \sum_{i \in I} d_i^T \quad (29)$$

$$= \frac{1}{D} \left(1 - \frac{1}{T}\right) \sum_{i \in I} \left(\frac{1}{1-\epsilon} F(\mathbf{s}_i^j) - \frac{1}{1+\epsilon} F(\mathbf{s}^{j-1})\right) d_i^{T-1} \quad (30)$$

$$\leq \frac{1}{D} \left(1 - \frac{1}{T}\right) \sum_{i \in I} \left(\frac{1+\epsilon}{1-\epsilon} f(\mathbf{s}_i^j) - \frac{1-\epsilon}{1+\epsilon} f(\mathbf{s}^{j-1})\right) d_i^{T-1} \quad (31)$$

$$\leq \left(1 - \frac{1}{k}\right) \left(\frac{1+\epsilon}{1-\epsilon} E[f(\mathbf{s}^j)] - \frac{1-\epsilon}{1+\epsilon} f(\mathbf{s}^{j-1})\right) \quad (32)$$

Inequality 29 comes from AM-GM inequality, defined as:

**Theorem 7.** (Hirschhorn, 2007) Given  $n$  non-negative numbers  $x_1, \dots, x_n$

$$x_1 + \dots + x_n \geq n \sqrt[n]{x_1 \times \dots \times x_n}$$

Thus, directly apply the theorem given us  $d_p d_i^{T-1} \leq \frac{1}{T} (d_p^T + (T-1)d_i^T)$ .

- $d_p < \frac{o}{M}$ , which also means  $d_p \leq \frac{o}{M} \leq E[d_{ij}] \leq \frac{1+\epsilon}{1-\epsilon} E[f(\mathbf{s}^j)] - \frac{1-\epsilon}{1+\epsilon} f(\mathbf{s}^{j-1})$ . So:

$$\begin{aligned} f(\mathbf{o}^{j-1}) - E[f(\mathbf{o}^j)] &\leq f(\mathbf{s}_p^j) - f(\mathbf{s}^{j-1}) \leq d_p \leq \left(1 - \frac{1}{k}\right) E[d_{ij}] + \frac{1}{k} \frac{o}{M} \\ &\leq \left(1 - \frac{1}{k}\right) \left(\frac{1+\epsilon}{1-\epsilon} E[f(\mathbf{s}^j)] - \frac{1-\epsilon}{1+\epsilon} f(\mathbf{s}^{j-1})\right) + \frac{1}{k} \frac{o}{M} \end{aligned}$$

- $|supp(\mathbf{o}^{j-1})| < |supp(\mathbf{o}^j)|$ , then  $e^j \notin supp(\mathbf{o})$ . Due to monotonicity of  $f$ .

$$f(\mathbf{o}^{j-1}) - E[f(\mathbf{o}^j)] \leq 0 \leq \left(1 - \frac{1}{k}\right) \left(\frac{1+\epsilon}{1-\epsilon} E[f(\mathbf{s}^j)] - \frac{1-\epsilon}{1+\epsilon} f(\mathbf{s}^{j-1})\right)$$

Therefore, in overall  $f(\mathbf{o}^{j-1}) - E[f(\mathbf{o}^j)] \leq (1 - \frac{1}{k})(\frac{1+\epsilon}{1-\epsilon} E[f(\mathbf{s}^j)] - \frac{1-\epsilon}{1+\epsilon} f(\mathbf{s}^{j-1})) + \frac{o}{kM}$

**Proof of Claim 4** We have

$$\begin{aligned} f(\mathbf{o}) - E[f(\mathbf{o}^t)] &= \sum_{j=1}^t E[f(\mathbf{o}^{j-1}) - f(\mathbf{o}^j)] \leq \sum_{j=1}^t \left( \left(1 - \frac{1}{k}\right) \left(\frac{1+\epsilon}{1-\epsilon} E[f(\mathbf{s}^j)] - \frac{1-\epsilon}{1+\epsilon} E[f(\mathbf{s}^{j-1})]\right) + \frac{o}{kM} \right) \\ &\leq \left(1 - \frac{1}{k}\right) \left(\frac{1+\epsilon}{1-\epsilon} E[f(\mathbf{s})] + \sum_{j=1}^{t-1} \frac{4\epsilon}{1-\epsilon^2} E[f(\mathbf{s}^j)]\right) + \frac{oB}{kM} \\ &\leq \left(1 - \frac{1}{k}\right) \frac{(1+\epsilon)^2 + 4B\epsilon}{1-\epsilon^2} E[f(\mathbf{s})] + \frac{1}{kM} f(\mathbf{o}) \end{aligned}$$

which completes the proof.

**Proof of Claim 5** Denote  $\{\langle u_1, j_1 \rangle, \dots, \langle u_r, j_r \rangle\}$  as a set of elements and their placements in  $\mathbf{o}^t$  that are not in  $\mathbf{s}$ .

For each  $\langle u_i, j_i \rangle$ , denote  $\mathbf{s}_i$  as  $\mathbf{s}$  when Alg. 3 encounters  $u_i$ . As  $u_i$  was not added into  $\mathbf{s}_i$ ,  $\frac{1}{1-\epsilon}F(\mathbf{s}_i \sqcup \langle u_i, j_i \rangle) - \frac{1}{1+\epsilon}F(\mathbf{s}_i) < \frac{o}{M}$

Let  $\mathbf{u}_i = \mathbf{s} \sqcup \{\langle u_1, j_1 \rangle, \dots, \langle u_i, j_i \rangle\}$ . We have

$$\begin{aligned} \mathbb{E}[f(\mathbf{o}^t)] - \mathbb{E}[f(\mathbf{s})] &= \sum_{i=1}^{B-t} \mathbb{E}[f(\mathbf{u}_i) - f(\mathbf{u}_{i-1})] \leq \sum_{i=1}^{B-t} \mathbb{E}[f(\mathbf{s}_i \sqcup \langle u_i, j_i \rangle) - f(\mathbf{s}^i)] \\ &\leq \sum_{i=1}^{B-t} \mathbb{E}\left[\frac{1}{1-\epsilon}F(\mathbf{s}_i \sqcup \langle u_i, j_i \rangle) - \frac{1}{1+\epsilon}F(\mathbf{s}_i)\right] \leq \sum_i^{B-t} \frac{o}{M} \leq \frac{1}{M}f(\mathbf{o}) \end{aligned}$$

which completes the proof.

## D.2. Approximation ratio of RSTREAM when $f$ is non-monotone

**Proof of Theorem 4** Similar to monotone case, the key of our proof is to show that:

$$\max(\alpha(M), \beta(M))\mathbb{E}[f(\mathbf{s}^t)] \geq f(\mathbf{o}) \quad (33)$$

If  $t = B$ , we have:

$$f(\mathbf{s}) \geq \frac{F(\mathbf{s})}{1+\epsilon} \geq \frac{F(\mathbf{s}^B)}{1+\epsilon} = \frac{1}{1+\epsilon} \sum_{i=1}^B (F(\mathbf{s}^i) - F(\mathbf{s}^{i-1})) \quad (34)$$

$$= \frac{1}{1+\epsilon} \sum_{i=1}^B \left( F(\mathbf{s}^i) - \frac{1-\epsilon}{1+\epsilon}F(\mathbf{s}^{i-1}) \right) - \frac{2\epsilon}{(1+\epsilon)^2} \sum_i^{B-1} F(\mathbf{s}^i) \quad (35)$$

$$\geq \frac{1-\epsilon}{1+\epsilon} \sum_{i=1}^B \frac{o}{M} - \frac{2\epsilon B}{(1+\epsilon)^2} F(\mathbf{s}) \geq \frac{(1-\epsilon)f(\mathbf{o})}{(1+\epsilon)(1+\gamma)M} - \frac{2\epsilon B}{1+\epsilon} f(\mathbf{s}) \quad (36)$$

Therefore, with  $t = B$ ,  $\frac{(1+\epsilon+2\epsilon B)(1+\gamma)M}{1-\epsilon}f(\mathbf{s}) \geq f(\mathbf{o})$ . The rest of the proof would focus on when  $t < B$ . We re-use notations  $\mathbf{o}_i^j, \mathbf{s}_i^j$  as in the monotone proof and still compare  $\mathbf{o}^{j-1}$  and  $\mathbf{o}^j$ , we have two following cases.

- $|\text{supp}(\mathbf{o}^{j-1})| < |\text{supp}(\mathbf{o}^j)|$ , which means  $e^j \notin \text{supp}(\mathbf{o})$ . We consider 2 sub-cases:

– If  $T < k$ , which means there exists  $i' \in [k]$  such that  $\frac{F(\mathbf{s}_{i'}^j)}{1-\epsilon} - \frac{F(\mathbf{s}_{i'}^{j-1})}{1+\epsilon} < \frac{o}{M} \leq \frac{\mathbb{E}[F(\mathbf{s}^j)]}{1-\epsilon} - \frac{F(\mathbf{s}^{j-1})}{1+\epsilon}$ . Then

$$\begin{aligned} f(\mathbf{o}^{j-1}) - \mathbb{E}[f(\mathbf{o}^j)] &= f(\mathbf{o}_{i'}^j) - f(\mathbf{o}^{j-1}) - \left( \mathbb{E}[f(\mathbf{o}^j)] + f(\mathbf{o}_{i'}^j) - 2f(\mathbf{o}^{j-1}) \right) \\ &\leq f(\mathbf{o}_{i'}^j) - f(\mathbf{o}^{j-1}) \leq f(\mathbf{s}_{i'}^j) - f(\mathbf{s}^{j-1}) \leq \frac{F(\mathbf{s}_{i'}^j)}{1-\epsilon} - \frac{F(\mathbf{s}^{j-1})}{1+\epsilon} \\ &\leq \frac{\mathbb{E}[F(\mathbf{s}^j)]}{1-\epsilon} - \frac{F(\mathbf{s}^{j-1})}{1+\epsilon} \leq \frac{1+\epsilon}{1-\epsilon} \mathbb{E}[f(\mathbf{s}^j)] - \frac{1-\epsilon}{1+\epsilon} f(\mathbf{s}^{j-1}) \end{aligned}$$

– If  $T = k$ , define a permutation  $\pi : [k] \rightarrow [k]$  such that  $\pi(i) \neq i$  for all  $i \in [k]$ . Then

$$\begin{aligned}
 f(\mathbf{o}^{j-1}) - \mathbb{E}[f(\mathbf{o}^j)] &= \frac{1}{D} \sum_{i \in [k]} \left( f(\mathbf{o}^{j-1}) - f(\mathbf{o}_i^j) \right) d_i^{T-1} \\
 &= \frac{1}{D} \sum_{i \in [k]} \left( f(\mathbf{o}_{\pi(i)}^j) - f(\mathbf{o}^{j-1}) - (f(\mathbf{o}_{\pi(i)}^j) + f(\mathbf{o}_i^j) - 2f(\mathbf{o}^{j-1})) \right) d_i^{T-1} \\
 &\leq \frac{1}{D} \sum_{i \in [k]} \left( f(\mathbf{o}_{\pi(i)}^j) - f(\mathbf{o}^{j-1}) \right) d_i^{T-1} \leq \frac{1}{D} \sum_i \left( f(\mathbf{s}_{\pi(i)}^j) - f(\mathbf{s}^{j-1}) \right) d_i^{T-1} \\
 &\leq \frac{1}{D} \sum_{i \in [k]} d_{\pi(i)} d_i^{T-1} \leq \frac{1}{D} \sum_{i \in [k]} d_i^T = \frac{1}{1-\epsilon} \mathbb{E}[F(\mathbf{s}^j)] - \frac{1}{1+\epsilon} F(\mathbf{s}^{j-1}) \\
 &\leq \frac{1+\epsilon}{1-\epsilon} \mathbb{E}[f(\mathbf{s}^j)] - \frac{1-\epsilon}{1+\epsilon} f(\mathbf{s}^{j-1})
 \end{aligned}$$

•  $|\text{supp}(\mathbf{o}^{j-1})| = |\text{supp}(\mathbf{o}^j)|$ . We re-use notation  $p, I, \mathbf{o}^{j-1/2}$  as in the monotone case and consider other two sub-cases:

– If  $d_p \geq \frac{o}{M}$ , then

$$\begin{aligned}
 f(\mathbf{o}^{j-1}) - \mathbb{E}[f(\mathbf{o}^j)] &= \frac{1}{D} \sum_{i \in I \setminus \{p\}} \left( f(\mathbf{o}^{j-1}) - f(\mathbf{o}_i^j) \right) d_i^{T-1} \\
 &= \frac{1}{D} \sum_{i \in I \setminus \{p\}} \left( 2f(\mathbf{o}_p^j) - 2f(\mathbf{o}^{j-1/2}) - (f(\mathbf{o}_p^j) + f(\mathbf{o}_i^j) - 2f(\mathbf{o}^{j-1/2})) \right) d_i^{T-1} \\
 &\leq \frac{2}{D} \sum_{i \in I \setminus \{p\}} \left( f(\mathbf{s}_p^j) - f(\mathbf{s}^{j-1}) \right) d_i^{T-1} \leq \frac{2}{D} \sum_{i \in I \setminus \{p\}} d_p d_i^{T-1} \leq \frac{2}{D} \left( 1 - \frac{1}{T} \right) \sum_{i \in I} d_i^T \\
 &\leq \left( 2 - \frac{2}{k} \right) \left( \frac{1+\epsilon}{1-\epsilon} \mathbb{E}[f(\mathbf{s}^j)] - \frac{1-\epsilon}{1+\epsilon} f(\mathbf{s}^{j-1}) \right)
 \end{aligned}$$

– If  $d_p = 0$ , which also means  $\frac{1}{1-\epsilon} F(\mathbf{s}_p^j) - \frac{1}{1+\epsilon} F(\mathbf{s}^{j-1}) < \frac{o}{M} \leq \frac{1}{1-\epsilon} \mathbb{E}[F(\mathbf{s}^j)] - \frac{1}{1+\epsilon} F(\mathbf{s}^{j-1})$ . So:

$$\begin{aligned}
 f(\mathbf{o}^{j-1}) - \mathbb{E}[f(\mathbf{o}^j)] &= 2f(\mathbf{o}_p^j) - 2f(\mathbf{o}^{j-1/2}) - \left( f(\mathbf{o}_p^j) + \mathbb{E}[f(\mathbf{o}^j)] - 2f(\mathbf{o}^{j-1/2}) \right) \\
 &\leq 2f(\mathbf{o}_p^j) - 2f(\mathbf{o}^{j-1/2}) \leq 2f(\mathbf{s}_p^j) - 2f(\mathbf{s}^{j-1}) \\
 &\leq \frac{2}{1-\epsilon} F(\mathbf{s}_p^j) - \frac{2}{1+\epsilon} F(\mathbf{s}^{j-1}) \leq \left( 2 - \frac{2}{k} \right) \left( \frac{\mathbb{E}[F(\mathbf{s}^j)]}{1-\epsilon} - \frac{F(\mathbf{s}^{j-1})}{1+\epsilon} \right) + \frac{2o}{kM} \\
 &\leq \left( 2 - \frac{2}{k} \right) \left( \frac{1+\epsilon}{1-\epsilon} \mathbb{E}[f(\mathbf{s}^j)] - \frac{1-\epsilon}{1+\epsilon} f(\mathbf{s}^{j-1}) \right) + \frac{2o}{kM}
 \end{aligned}$$

Since  $k \geq 2$ , in overall,  $f(\mathbf{o}^{j-1}) - \mathbb{E}[f(\mathbf{o}^j)] \leq \left( 2 - \frac{2}{k} \right) \left( \frac{1+\epsilon}{1-\epsilon} \mathbb{E}[f(\mathbf{s}^j)] - \frac{1-\epsilon}{1+\epsilon} f(\mathbf{s}^{j-1}) \right) + \frac{2o}{kM}$ . We have

$$f(\mathbf{o}) - \mathbb{E}[f(\mathbf{o}^t)] = \sum_{j=1}^t \left( \mathbb{E}[f(\mathbf{o}^{j-1})] - \mathbb{E}[f(\mathbf{o}^j)] \right) \leq \sum_{j=1}^t \left( \left( 2 - \frac{2}{k} \right) \left( \frac{1+\epsilon}{1-\epsilon} \mathbb{E}[f(\mathbf{s}^j)] - \frac{1-\epsilon}{1+\epsilon} f(\mathbf{s}^{j-1}) \right) + \frac{2o}{kM} \right) \quad (37)$$

$$= \left( 2 - \frac{2}{k} \right) \left( \frac{1+\epsilon}{1-\epsilon} \mathbb{E}[f(\mathbf{s}^t)] + \sum_{i=1}^{t-1} \frac{4\epsilon}{1-\epsilon^2} \mathbb{E}[f(\mathbf{s}^i)] \right) + \frac{2oB}{kM} \quad (38)$$

$$\leq \left( 2 - \frac{2}{k} \right) \frac{(1+\epsilon)^2 + 4\epsilon B}{1-\epsilon^2} \max_{i \leq t} \mathbb{E}[f(\mathbf{s}^i)] + \frac{2}{kM} f(\mathbf{o}) \quad (39)$$

$$\leq \left( 2 - \frac{2}{k} \right) \frac{(1+\epsilon)^2 + 4\epsilon B}{(1-\epsilon)^2} \mathbb{E}[f(\mathbf{s})] + \frac{2}{kM} f(\mathbf{o}) \quad (40)$$

Also, similar to monotone case, as  $\mathbf{s}^t \sqsubseteq \mathbf{o}^t$ , denote  $\{\langle u_1, j_1 \rangle, \dots, \langle u_r, j_r \rangle\}$  as a set of elements and their placement in  $\mathbf{o}^t$  that are not in  $\mathbf{s}^t$ . For each  $\langle u_i, j_i \rangle$ , denote  $\mathbf{s}_i$  as  $\mathbf{s}^t$  when Alg. 1 encounters  $u_i$ . Denote  $\mathbf{u}_i = \mathbf{s}^t \sqcup \{\langle u_i, j_i \rangle\}$ . We have



$$\mathbb{E}[f(\mathbf{o}^t)] - \mathbb{E}[f(\mathbf{s}^t)] = \sum_{i=1}^{B-t} \left( \mathbb{E}[f(\mathbf{u}^i) - f(\mathbf{u}^{i-1})] \right) \leq \sum_{i=1}^{B-t} \left( \mathbb{E}[f(\mathbf{s}_i \sqcup \langle u_i, j_i \rangle) - f(\mathbf{s}_i)] \right) \quad (41)$$

$$\leq \sum_{i=1}^{B-t} \mathbb{E} \left[ \frac{F(\mathbf{s}_i \sqcup \langle u_i, j_i \rangle)}{1 - \epsilon} - \frac{F(\mathbf{s}_i)}{1 + \epsilon} \right] \leq \sum_{i=1}^{B-t} \frac{o}{M} \leq \frac{1}{M} f(\mathbf{o}) \quad (42)$$

Combining Equ. 40 and 42, we have

$$f(\mathbf{o}) \leq \frac{M}{kM - k - 2} \frac{(3k - 2)(1 + \epsilon)^2 + (8k - 8)\epsilon B}{(1 - \epsilon)^2} \mathbb{E}[f(\mathbf{s})]$$

The approximation ratio of RSTREAM when discarding assumption of known  $f(\mathbf{o})$  trivially follows as in the proof of the monotone case.

## E. Sampling Method for Influence Maximization with $k$ topics

In this part, we would present the sampling method that helps obtaining  $F(\mathbf{s})$  satisfying  $(1 - \epsilon)\mathbb{I}(\mathbf{s}) \leq F(\mathbf{s}) \leq (1 + \epsilon)\mathbb{I}(\mathbf{s})$  with high probability. We adopt a concept of Reverse Influence Sampling (RIS) (Borgs et al., 2014) to the problem as follows:

Given a social network  $G = (V, E)$  and  $w_{u,v}^i$  is a weight of edge  $(u, v)$  on topic  $i$ , a random Reverse Reachable (RR) sample  $\mathcal{R} = \{R_1, \dots, R_k\}$  is generated from  $G$  by: (1) selecting a random node  $v \in V$ ; (2) generating sample graph  $\{g_1, g_2, \dots, g_k\}$  from  $G$ , where  $g_i$  is generated from weights  $\{w_{u,v}^i\}$  for all  $(u, v) \in E$ ; (3) return  $\mathcal{R} = \{R_1, \dots, R_k\}$  where  $R_i$  is a set of nodes that can reach  $v$  in  $g_i$ . A  $k$ -set  $\mathbf{s} = \{S_1, \dots, S_k\}$  would activate the random sample  $\mathcal{R}$  iff there exists  $i \in [k]$  that  $S_i \cap R_i \neq \emptyset$ . For simplicity, denote  $\mathbf{s} \triangleright \mathcal{R}$  as an indicator variable whether  $\mathbf{s}$  activates  $\mathcal{R}$ . Using a similar proof as **Observation 3.2** (Borgs et al., 2014), we have  $\mathbb{I}(\mathbf{s}) = |V| \cdot \Pr_{\mathcal{R}}[\mathbf{s} \triangleright \mathcal{R}]$ .

To estimate  $\mathbb{I}(\mathbf{s})$ , we generate multiple samples  $\mathcal{R}_1, \dots, \mathcal{R}_n$  and let  $F(\mathbf{s}) = \frac{|V|}{n} \sum_{i=1}^n \mathbf{s} \triangleright \mathcal{R}_i$ . We apply Chernoff Bound<sup>2</sup> to bound the number of samples, which guarantee  $F(\mathbf{s})$  is an  $\epsilon$ -estimate of  $\mathbb{I}(\mathbf{s})$  with high probability. The Chernoff Bound theorem is stated as follows.

**Theorem 8.** (Chernoff bound) Suppose  $X_1, \dots, X_n$  are independent random variables taking values in  $\{0, 1\}$ . Let  $X$  denote their sum and let  $\mu = \mathbb{E}[X]$ . Then for  $\epsilon \in [0, 1]$  we have

$$\Pr\left(X \leq (1 - \epsilon)\mu\right) \leq e^{-\frac{\epsilon^2\mu}{2}}$$

$$\Pr\left(X \geq (1 + \epsilon)\mu\right) \leq e^{-\frac{\epsilon^2\mu}{3}}$$

Therefore, the number of samples that helps us obtaining  $\epsilon$ -estimate of  $\mathbb{I}(\mathbf{s})$  is stated in the following lemma.

**Lemma 3.** Given a seed set  $\mathbf{s}$ , by generating at least  $n = \frac{3|V|}{\epsilon^2|\mathbf{s}|} \ln \frac{1}{1 - \sqrt{\lambda}}$  RR samples,  $F(\mathbf{s})$  is  $\epsilon$ -estimate of  $\mathbb{I}(\mathbf{s})$  with probability at least  $\lambda$ .

*Proof.* A slight change in algebra in Chernoff bound helps us obtaining:

$$\Pr\left((1 - \epsilon)\mathbb{I}(\mathbf{s}) \leq F(\mathbf{s}) \leq (1 + \epsilon)\mathbb{I}(\mathbf{s})\right) \geq \left(1 - e^{-\frac{\epsilon^2\mathbb{I}(\mathbf{s})n}{3|V|}}\right)^2 \quad (43)$$

Since  $\mathbb{I}(\mathbf{s}) \geq |\mathbf{s}|$ ,  $n \geq \frac{3|V|}{\epsilon^2|\mathbf{s}|} \ln \frac{1}{1 - \sqrt{\lambda}}$  guarantees  $F(\mathbf{s})$  is  $\epsilon$ -estimate of  $\mathbb{I}(\mathbf{s})$  with probability at least  $\lambda$   $\square$

In experiment, we set  $\lambda = 0.8$  whenever the algorithms query  $\mathbb{I}(\cdot)$ .

<sup>2</sup><http://math.mit.edu/~goemans/18310S15/chernoff-notes.pdf>
